# Supplementary material for: Sieve-Like CNT Film Coupled with TiO2 Nanowire for High-Performance Continuous-Flow Photodegradation of Rhodamine B under Visible Light Irradiation
Source: MDPI journal article supplement (doi:10.3390/nano11051335), 2021-05-19
Supplement: s1 [file s1]

## Supporting information

### **Sieve-Like CNT Film Coupled with TiO<sub>2</sub> Nanowire for High-Performance Continuous-Flow Photodegradation of Rhodamine B under Visible Light Irradiation**

Zhengpeng Yang<sup>1</sup>, Xiaoting Lv<sup>1,2</sup>, Xuqing Liu<sup>3</sup>, Shengmin Jia<sup>1,2</sup>, Yongyi Zhang<sup>2,4,\*</sup>, Yingying Yu<sup>2,\*</sup>, Chunjing Zhang<sup>1</sup> and Dandan Liu<sup>2,\*</sup>

<sup>1</sup> Henan Key Laboratory of Materials on Deep-Earth Engineering, School of Materials Science and Engineering, Henan Polytechnic University, Jiaozuo 454003, China

<sup>2</sup> Key Laboratory of Multifunctional Nanomaterials and Smart Systems, Advanced Materials Division, Suzhou Institute of Nano-Tech and Nano-Bionics, Chinese Academy of Sciences, Suzhou 215123, China

<sup>3</sup> Department of Materials, The University of Manchester, Oxford Road, Manchester M13 9PL, UK

<sup>4</sup> Division of Nanomaterials and Jiangxi Key Lab of Carbonene Materials, Suzhou Institute of Nano-Tech and Nano-Bionics, Nanchang, Chinese Academy of Sciences, Nanchang 330200, China

\* Corresponding authors at: Suzhou Institute of Nano-Tech and Nano-Bionics, Chinese Academy of Sciences, Suzhou 215123, PR China.

*E-mail addresses:* yyzhang2011@sinano.ac.cn (Y.Y. Zhang),  
yyyu2019@sinano.ac.cn (Y.Y. Yu), ddliu2015@sinano.ac.cn (D.D. Liu).

## Supplementary Figures

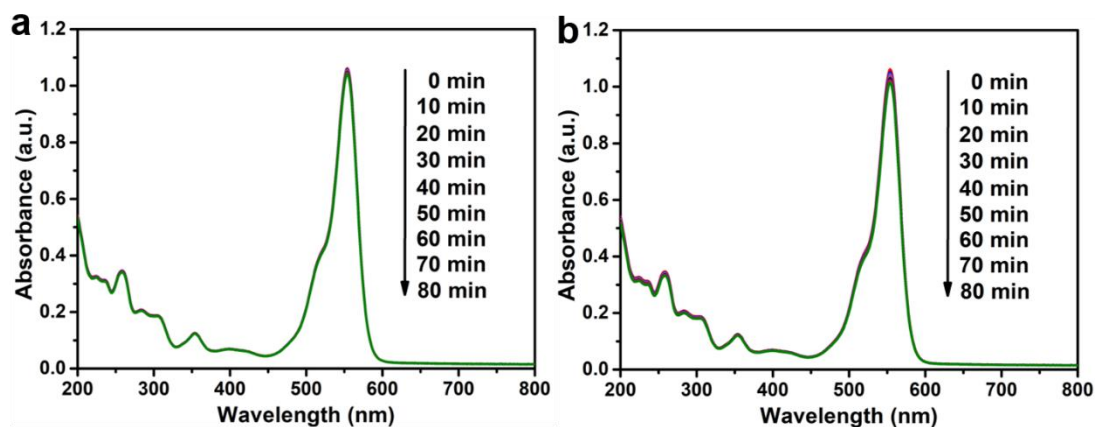

**Figure S1.** Absorption spectra of RhB with no photocatalyst (a) and only CNT film (b) in different reaction time under simulated solar irradiation.

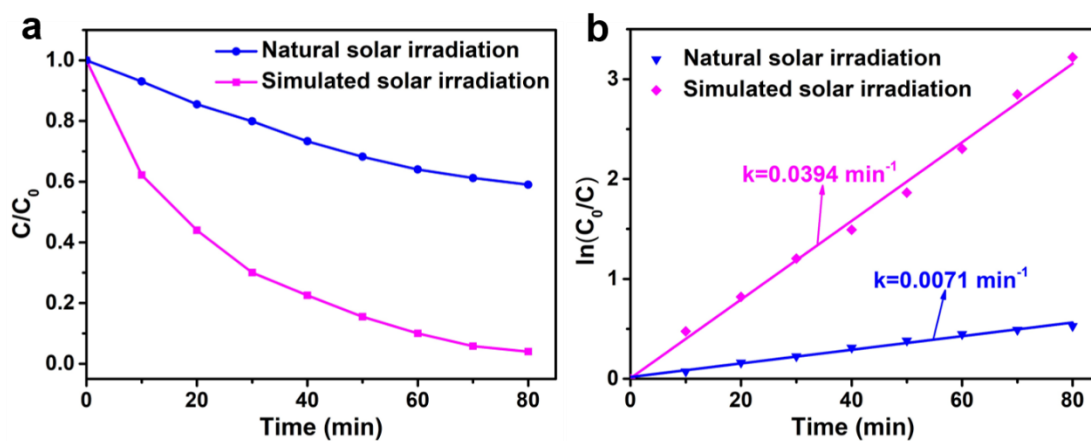

**Figure S2.** Photocatalytic degradation curves (a) and kinetic curves (b) of RhB with SCTF-2.5 as photocatalyst under natural and simulated solar irradiation.
